# Supplementary material for: Taxonomic distribution of large DNA viruses in the sea
Source: PubMed Central journal article supplement (PMC2530865; doi:10.1186/gb-2008-9-7-r106), 2008-07-03
Supplement: gb-2008-9-7-r106-S1.pdf [file gb-2008-9-7-r106-S1.pdf]

**List of the PolB sequences used in this study.** IDs are displayed as retrieved in NRDB, RefSeq and KEGG databases. Selected sequences used in the reference multiple sequence alignment are displayed in bold.

| <b>IDs</b>       | <b>Species</b>                                  | <b>Annotation</b>                                      |
|------------------|-------------------------------------------------|--------------------------------------------------------|
| <b>AAA58439</b>  | <i>Homo sapiens</i>                             | <b>DNA polymerase-delta catalytic-subunit</b>          |
| <b>AAC62689</b>  | <i>Cenarchaeum symbiosum</i>                    | <b>archael family B DNA polymerase</b>                 |
| <b>AAG09402</b>  | <i>Homo sapiens</i>                             | <b>DNA polymerase zeta catalytic subunit variant 1</b> |
| AAK14825         | <i>Plasmodium falciparum</i>                    | DNA polymerase alpha                                   |
| <b>AAR26842</b>  | <i>Feldmannia irregularis virus a</i>           | <b>FirrV-1-A18</b>                                     |
| AAZ32459         | uncultured euryarchaeote Alv-FOS1               | DNA polymerase family B                                |
| <b>ABU2317</b>   | <i>Pyramimonas orientalis virus</i>             | <b>putative B family DNA polymerase I</b>              |
| ABU2318          | <i>Phaeocystis pouchetii virus</i>              | putative B family DNA polymerase I                     |
| <b>ABU23716</b>  | <i>Chrysochromulina ericina virus</i>           | <b>putative B family DNA polymerase I</b>              |
| BAA35142         | <i>Paramecium bursaria</i> Chlorella virus CVK2 | DNA polymerase                                         |
| <b>BAE06251</b>  | <i>Heterosigma akashiwo virus 01</i>            | <b>B-family DNA polymerase</b>                         |
| <b>BAE19749</b>  | <b>Human herpesvirus 1</b>                      | <b>DNA polymerase UL30</b>                             |
| <b>CAC84471</b>  | <i>Heliothis virescens ascovirus 3c</i>         | <b>delta DNA polymerase</b>                            |
| CM1176C *        | <i>Cyanidioschyzon merolae</i>                  | DNA polymerase alpha, subunit A                        |
| CMQ098C * #      | <i>Cyanidioschyzon merolae</i>                  | DNA polymerase epsilon, subunit A                      |
| CMR103C *        | <i>Cyanidioschyzon merolae</i>                  | DNA polymerase zeta subunit                            |
| NP_006222 #      | <i>Homo sapiens</i>                             | DNA polymerase epsilon catalytic subunit               |
| <b>NP_039988</b> | <b>Human herpesvirus 5 strain AD169</b>         | <b>UL54</b>                                            |
| NP_041148 #      | Ictalurid herpesvirus 1                         | ORF57                                                  |
| NP_042094        | Variola virus                                   | hypothetical protein VARVgp050                         |
| <b>NP_042783</b> | <b>African swine fever virus</b>                | <b>DNA polymerase</b>                                  |
| NP_043990        | Molluscum contagiosum virus                     | MC039L                                                 |
| <b>NP_048107</b> | <i>Melanoplus sanguinipes</i> entomopoxvirus    | <b>ORF MSV036 putative DNA polymerase</b>              |
| <b>NP_048532</b> | <i>Paramecium bursaria</i> Chlorella virus 1    | <b>hypothetical protein PBCV1_A185R</b>                |

|                  |                                                 |                                                                 |
|------------------|-------------------------------------------------|-----------------------------------------------------------------|
| <b>NP_049662</b> | <b>Enterobacteria phage T4</b>                  | <b>gp43 DNA polymerase</b>                                      |
| NP_051748        | Myxoma virus                                    | m34L                                                            |
| <b>NP_058633</b> | <b><i>Homo sapiens</i></b>                      | <b>DNA polymerase alpha catalytic subunit</b>                   |
| NP_064832        | <i>Amsacta moorei</i> entomopoxvirus 'L'        | DNA-directed DNA polymerase                                     |
| <b>NP_069333</b> | <b><i>Archaeoglobus fulgidus</i> DSM 4304</b>   | <b>DNA polymerase B1 (polB)</b>                                 |
| NP_073424        | Yaba-like disease virus                         | 39L protein                                                     |
| <b>NP_077578</b> | <b><i>Ectocarpus siliculosus</i> virus 1</b>    | <b>EsV-1-93</b>                                                 |
| NP_146963        | <i>Aeropyrum pernix</i> K1                      | family B DNA polymerase I                                       |
| NP_148383        | <i>Aeropyrum pernix</i> K1                      | family B DNA polymerase II                                      |
| <b>NP_148473</b> | <b><i>Aeropyrum pernix</i> K1</b>               | <b>DNA polymerase II</b>                                        |
| <b>NP_148895</b> | <b><i>Cydia pomonella</i> granulovirus</b>      | <b>ORF111 DNAPOL</b>                                            |
| <b>NP_149500</b> | <b>Invertebrate iridescent virus 6</b>          | <b>037L</b>                                                     |
| <b>NP_203396</b> | <b><i>Culex nigripalpus</i> NPV</b>             | <b>CUN091 putative dnapolymerase, similar to AcMNPV ORF65</b>   |
| <b>NP_279569</b> | <b>Halobacterium sp. NRC-1</b>                  | <b>DNA polymerase B1</b>                                        |
| NP_342079        | <i>Sulfolobus solfataricus</i> P2               | DNA polymerase II                                               |
| <b>NP_342896</b> | <b><i>Sulfolobus solfataricus</i> P2</b>        | <b>DNA polymerase II (DNA polymerase B2) carboxy-end (dpo2)</b> |
| <b>NP_378066</b> | <b><i>Sulfolobus tokodaii</i> str. 7</b>        | <b>DNA polymerase II</b>                                        |
| NP_393928        | <i>Thermoplasma acidophilum</i> DSM 1728        | DNA polymerase II                                               |
| <b>NP_394366</b> | <b><i>Thermoplasma acidophilum</i> DSM 1728</b> | <b>DNA polymerase II</b>                                        |
| NP_478036 #      | Shrimp white spot syndrome virus                | wsv514                                                          |
| <b>NP_542554</b> | <b>Halorubrum phage HF2</b>                     | <b>putative DNA-dependent DNA polymerase</b>                    |
| <b>NP_559083</b> | <b><i>Pyrobaculum aerophilum</i> str. IM2</b>   | <b>possible DNA-directed DNA polymerase (B2)</b>                |
| <b>NP_559770</b> | <b><i>Pyrobaculum aerophilum</i> str. IM2</b>   | <b>DNA polymerase II</b>                                        |
| <b>NP_559825</b> | <b><i>Pyrobaculum aerophilum</i> str. IM2</b>   | <b>DNA polymerase II</b>                                        |
| NP_570196        | Swinepox virus                                  | SPV036 DNA polymerase                                           |
| NP_577941        | <i>Pyrococcus furiosus</i> DSM 3638             | DNA-directed DNA polymerase                                     |
| NP_586236 #      | <i>Encephalitozoon cuniculi</i> GB-M1           | DNA polymerase epsilon                                          |

|                     |                                                        |                                                        |
|---------------------|--------------------------------------------------------|--------------------------------------------------------|
| NP_597442           | <i>Encephalitozoon cuniculi</i> GB-M1                  | DNA-directed DNA polymerase alpha                      |
| NP_612241           | Infectious spleen and kidney necrosis virus            | putative DNA polymerase                                |
| <b>NP_614322</b>    | <b><i>Methanopyrus kandleri</i> AV19</b>               | <b>B family DNA polymerase</b>                         |
| <b>NP_615844</b>    | <b><i>Methanosarcina acetivorans</i> C2A</b>           | <b>DNA-directed DNA polymerase</b>                     |
| NP_663155 #         | <i>Chlorobium tepidum</i> TLS                          | DNA polymerase family B protein                        |
| NP_690550 #         | <i>Heliothis zea</i> virus 1                           | DNA polymerase I                                       |
| <b>NP_835679</b>    | <b>Rhodothermus phage RM378</b>                        | <b>similar to DNA-directed DNA polymerase</b>          |
| NP_899330           | Vibrio phage KVP40                                     | DNA polymerase                                         |
| NP_943895           | Aeromonas phage Aeh1                                   | DNA polymerase                                         |
| NP_954286 #         | <i>Geobacter sulfurreducens</i> PCA                    | DNA polymerase II, putative                            |
| <b>NP_955144</b>    | <b>Canarypox virus</b>                                 | <b>CNPV121 DNA polymerase</b>                          |
| <b>P30320</b>       | <b><i>Paramecium bursaria</i> Chlorella virus NY2A</b> | <b>DNA polymerase</b>                                  |
| <b>P56689</b>       | <b><i>Thermococcus gorgonarius</i></b>                 | <b>DNA polymerase (TO POL)</b>                         |
| XP_001011832        | <i>Tetrahymena thermophila</i> SB210                   | DNA polymerase family B containing protein             |
| XP_001013747        | <i>Tetrahymena thermophila</i> SB210                   | DNA polymerase catalytic subunit                       |
| XP_001017761        | <i>Tetrahymena thermophila</i> SB210                   | DNA polymerase family B containing protein             |
| XP_001032353        | <i>Tetrahymena thermophila</i> SB210                   | DNA polymerase family B containing protein             |
| XP_001301333 #      | <i>Trichomonas vaginalis</i> G3                        | hypothetical protein TVAG_050650                       |
| XP_001303643        | <i>Trichomonas vaginalis</i> G3                        | DNA polymerase family B containing protein             |
| <b>XP_001306852</b> | <b><i>Trichomonas vaginalis</i> G3</b>                 | <b>polymerase alpha subunit, putative</b>              |
| <b>XP_001326973</b> | <b><i>Trichomonas vaginalis</i> G3</b>                 | <b>polymerase zeta subunit, putative</b>               |
| XP_001347646        | <i>Plasmodium falciparum</i> 3D7                       | DNA polymerase zeta catalytic subunit, putative        |
| <b>XP_001683479</b> | <b><i>Leishmania major</i> strain Friedlin</b>         | <b>DNA polymerase zeta catalytic subunit, putative</b> |
| XP_001685930        | <i>Leishmania major</i> strain Friedlin                | DNA polymerase delta catalytic subunit, putative       |
| XP_001707891        | <i>Giardia lamblia</i>                                 | DNA polymerase delta, catalytic subunit                |
| XP_626972           | <i>Cryptosporidium parvum</i> Iowa II                  | DNA polymerase alpha catalytic subunit                 |

|                     |                                                   |                                                       |
|---------------------|---------------------------------------------------|-------------------------------------------------------|
| XP_627031 #         | <i>Cryptosporidium parvum</i> Iowa II             | DNA polymerase epsilon catalytic subunit              |
| XP_638283           | <i>Dictyostelium discoideum</i> AX4               | DNA polymerase delta catalytic subunit                |
| XP_639211 #         | <i>Dictyostelium discoideum</i> AX4               | putative DNA polymerase epsilon subunit A             |
| XP_640277           | <i>Dictyostelium discoideum</i> AX4               | DNA polymerase alpha catalytic subunit                |
| XP_645553           | <i>Dictyostelium discoideum</i> AX4               | DNA polymerase zeta catalytic subunit                 |
| XP_654477           | <i>Entamoeba histolytica</i> HM-1                 | DNA polymerase delta catalytic subunit                |
| XP_656768           | <i>Entamoeba histolytica</i> HM-1                 | DNA polymerase zeta catalytic subunit                 |
| XP_657373           | <i>Entamoeba histolytica</i> HM-1                 | DNA polymerase alpha catalytic subunit                |
| XP_763220           | <i>Theileria parva</i> strain Muguga              | DNA polymerase alpha                                  |
| XP_843543 #         | <i>Leishmania major</i> strain Friedlin           | DNA polymerase epsilon catalytic subunit, putative    |
| XP_847160           | <i>Trypanosoma brucei</i> TREU927                 | DNA polymerase zeta catalytic subunit, putative       |
| XP_847318           | <i>Trypanosoma brucei</i> TREU927                 | DNA polymerase alpha catalytic subunit                |
| XP_951513           | <i>Trypanosoma brucei</i> TREU927                 | DNA polymerase delta catalytic subunit                |
| XP_955596           | <i>Encephalitozoon cuniculi</i> GB-M1             | DNA polymerase delta catalytic subunit                |
| XP_966285 #         | <i>Plasmodium falciparum</i> 3D7                  | DNA polymerase epsilon, catalytic subunit a, putative |
| <b>YP_001055588</b> | <b><i>Pyrobaculum calidifontis</i> JCM 11548</b>  | <b>DNA polymerase B region</b>                        |
| <b>YP_001097770</b> | <b><i>Methanococcus maripaludis</i> C5</b>        | <b>DNA polymerase Pol2</b>                            |
| YP_001129537 #      | <i>Prosthecochloris vibrioformis</i> DSM 265      | DNA polymerase B region                               |
| YP_003817           | <i>Ambystoma tigrinum</i> virus                   | DNA polymerase                                        |
| YP_024639 #         | <i>Ostreid herpesvirus 1</i>                      | ORF100                                                |
| <b>YP_025135</b>    | <b><i>Neodiprion sertifer</i> NPV</b>             | <b>DNA polymerase</b>                                 |
| <b>YP_073706</b>    | <b>Lymphocystis disease virus - isolate China</b> | <b>DNA polymerase elongation subunit family B</b>     |
| YP_136425           | <i>Haloarcula marismortui</i> ATCC 43049          | DNA polymerase B elongation subunit                   |
| <b>YP_142676</b>    | <b><i>Acanthamoeba polyphaga</i> mimivirus</b>    | <b>DNA polymerase (B family)</b>                      |
| YP_195168           | Cyanophage phage S-PM2                            | DNA polymerase gp43                                   |
| YP_214414           | Cyanophage P-SSM2                                 | T4-like DNA polymerase                                |
| <b>YP_214707</b>    | <b>Cyanophage P-SSM4</b>                          | <b>gp43</b>                                           |

|                    |                                                         |                                                              |
|--------------------|---------------------------------------------------------|--------------------------------------------------------------|
| <b>YP_293784</b>   | <b><i>Emiliana huxleyi</i> virus 86</b>                 | <b>putative DNA polymerase delta catalytic subunit</b>       |
| YP_320359 #        | <i>Anabaena variabilis</i>                              | DNA polymerase I-like                                        |
| YP_401712          | Human herpesvirus 4 type 1                              | BALF5                                                        |
| YP_502623          | <i>Methanospirillum hungatei</i> JF-1                   | DNA polymerase B region                                      |
| YP_656618 #        | Ranid herpesvirus 2                                     | DNA polymerase subunit catalytic subunit                     |
| YP_656727 #        | Ranid herpesvirus 1                                     | ORF72                                                        |
| <b>YP_684489</b>   | <b>uncultured methanogenic archaeon RC-I</b>            | <b>DNA-directed DNA polymerase B</b>                         |
| <b>YP_687101</b>   | <b>uncultured methanogenic archaeon RC-I</b>            | <b>putative DNA-directed DNA polymerase B</b>                |
| YP_717843          | Phage Syn9                                              | gp176                                                        |
| <b>YP_751308</b>   | <b><i>Shewanella frigidimarina</i> NCIMB 400</b>        | <b>DNA polymerase B region</b>                               |
| YP_762356          | <i>Spodoptera frugiperda</i> ascovirus 1a               | 125.8 kDa Delta DNA Polymerase                               |
| <b>YP_803224</b>   | <b><i>Trichoplusia ni</i> ascovirus 2c</b>              | <b>DNA polymerase</b>                                        |
| <b>YP_843812</b>   | <b><i>Methanosaeta thermophila</i> PT</b>               | <b>DNA polymerase Pol2</b>                                   |
| YP_856637          | <i>Aeromonas hydrophila</i> subsp. hydrophila ATCC 7966 | DNA polymerase II                                            |
| <b>ZP_00923866</b> | <b><i>Escherichia coli</i> 101-1</b>                    | <b>COG0417: DNA polymerase elongation subunit (family B)</b> |
|                    |                                                         |                                                              |

(\*) KEGG ID; (#) Sequences not included in the complete reference set.
