# Supplementary material for: Taxonomic distribution of large DNA viruses in the sea
Source: PubMed Central journal article supplement (PMC2530865; doi:10.1186/gb-2008-9-7-r106), 2008-07-03
Supplement: gb-2008-9-7-r106-S2.pdf [file gb-2008-9-7-r106-S2.pdf]

YP\_001055588.1 P. calidifontis\* SPGKLE... 73  
NP\_559088.1 P. aerophilum3\* SIAALAE... 73  
NP\_203396.1 CnNPV\* GAVN... 138  
NP\_025135.1 NsnNPV\* GIMK... 127  
NP\_148895.1 CpGranulo\* T... 134  
NP\_835679.1 phase\_RM378\* NP... 50  
NP\_048473.2 A.pernix1\* NP... 42  
NP\_342896.1 S. solifastarius2\* NP... 43  
NP\_393928.1 T.acidophilum2 NP... 37  
NP\_042783.1 AFSV\* YP... 45  
YP\_195168.1 phase\_SFM2 YP... 43  
YP\_214414.1 phase\_P-SM2 YP... 43  
YP\_214707.1 phase\_P-SM4 YP... 43  
YP\_717843.1 phase\_syn9 YP... 43  
NP\_943895.1 phase\_Aehl NP... 61  
NP\_049662.1 T4\* SP... 74  
NP\_899330.1 phase\_KVP40 NP... 43  
NP\_064832.1 AnEPV NP... 44  
NP\_048107.1 MeEPV\* NP... 46  
NP\_955144.1 Canarypox\* NP... 44  
NP\_043990.1 MCV NP... 44  
NP\_042094.1 Variola NP... 44  
NP\_073424.1 Yaba NP... 44  
NP\_951749.1 H.marismortui NP... 44  
NP\_570196.1 Swinepox NP... 44  
XP\_001347646.1 P.falciplarumZ GSO... 111  
YP\_803224.1 TnAscov\* GCO... 82  
YP\_762356.1 sFAscov GCO... 85  
NP\_542554.1 H.alovirus\* AN... 79  
YP\_751308.1 s.frigidimarina\* YP... 43  
YP\_856637.1 A.hydrophila ZP... 43  
ZP\_00923866.1 E.coli\* NP... 73  
YP\_136495.1 H.marismortui YP... 44  
NP\_279569.1 Halobact\* YP... 73  
NP\_684489.1 UnArch1\* YP... 73  
NP\_394366.1 T.acidophilum1\* NP... 43  
AAZ32459.1 AlivP0S1 NP... 41  
XP\_001306852.1 T.thermophila2\* A... 75  
NP\_597442.1 E.cuniculica\* CA... 80  
XP\_657373.1 E.histolytica\* CA... 132  
CM1176C\_C.merolaeA CA... 108  
XP\_001013747.2 T.thermophilaA NP... 87  
AAK14825.1 P.falciplarumA NP... 80  
XP\_847318.1 T.brucei1A NP... 80  
XP\_640277.1 D.dicoideuma\* NP... 44  
NP\_058633.2 H.sapiensA\* A... 96  
XP\_763220.1 T.parvaA CA... 99  
XP\_626972.1 C.parvuma NP... 78  
XP\_00130643.1 T.vaginalis2 GSO... 80  
XP\_656768.1 E.histolyticaZ GSO... 80  
XP\_001683479.1 L.majoz2\* GSO... 79  
XP\_847160.1 T.bruceiZ GSO... 79  
CMR103C\_C.merolaeZ GSO... 79  
XP\_645553.1 D.discoideumZ GSO... 79  
AAQ0902.1 H.sapiensZ\* GSO... 79  
XP\_00101832.1 T.thermophilaZ1 GSO... 79  
XP\_001017761.1 T.thermophilaZ2 GSO... 79  
NP\_149500.1 IiIV6\* NP... 43  
NP\_612241.1 Isknv NP... 43  
NP\_020331.1 F1At YP... 43  
YP\_073706.1 IdV\* NP... 43  
NP\_687101.1 UnArch2\* D... 120  
AAC62689.1 C.cenarchaeum\* YP... 43  
NP\_559825.1 P.aerophilum1\* YP... 43  
NP\_146963.1 A.pernix1 YP... 43  
NP\_342079.1 S.solfataricus1 YP... 52  
YP\_142676.1 Mimivirus\* YP... 80  
ABU2317.1 PoV1\* GGO... 77  
ABU2318.1 PpV1 GGO... 77  
ABU23716.1 CeV1\* GGO... 77  
NP\_039988.1 H.therpes1 GGO... 163  
BAE19749.1 H.therpes1 GGO... 124  
YP\_401712.1 H.therpes4 GGO... 77  
NP\_069333.1 A.fulgidas\* GGO... 43  
NP\_378066.1 s.tokoadai11 GGO... 43  
NP\_148383.2 A.pernix2\* GGO... 43  
NP\_559770.1 P.aerophilum2\* GGO... 43  
NP\_614322.1 M.kandleri\* GGO... 43  
YP\_001097770.1 M.maripaludis\* GGO... 43  
NP\_577941.1 P.furiosus GGO... 43  
P56689\_T.gorgonarius\* GGO... 43  
NP\_02949.1 F1V1 GGO... 43  
NP\_075578.1 EsV93\* GGO... 45  
YP\_293784.1 EHV86\* GGO... 44  
P30320\_CVNY2A\* GGO... 44  
BAA35142.1 CVK2 GGO... 44  
NP\_048532.1 PBCV1\* GGO... 43  
NP\_615844.1 M.macthorans\* GGO... 43  
YP\_843812.1 M.thermophila\* GGO... 82  
BAR06251.1 Hav1\* GGO... 44  
XP\_001707891.1 G.lambliad YP... 46  
XP\_955596.1 E.cuniculid YP... 44  
XP\_001326973.1 T.thermophilaS\* GGO... 76  
XP\_001032353.1 T.thermophilaD YP... 44  
XP\_654477.1 E.histolyticaD YP... 44  
XP\_638283.1 D.discoideumD YP... 44  
AAA58439.1 H.sapiensD YP... 44  
XP\_00168347.1 T.bruceiD YP... 44  
XP\_951513.1 T.bruceiD YP... 44  
ruler 1.....10.....20.....30.....40.....50.....60.....70.....80.....90.....100.....110.....120.....130.....140.....150.....160.....170.....180.....190.....200

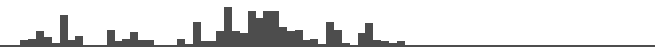

YP\_001055588.1 P.calidifontis\* .....SDGKLV.....ITG GSRV.....CDE  
 NP\_559083.1 P.aerophilum\* .....SNGI.....IAG GCRV.....DDE  
 NP\_203396.1 CnNPV\* .....SNG DGLA.....PPE  
 YP\_025135.1 MNPV\* .....ENG DWRL.....IHO  
 NP\_148895.1 CpGranulo\* .....ANK KILQ.....NON  
 NP\_835679.1 phage\_P-5M2\* .....YGCRRVENVKIPVQDEEESGPIPIIDSGNPSRDEPLVENSBEKQKSNITLVNPSGICW.....YKE  
 NP\_148473.2 A.pernix1\* .....CGTIDF.....AEC GGRV.....CDE  
 NP\_342896.1 S.solfataricus2\* .....DDEKSEHS.....CDE  
 NP\_393928.1 T.acidophilum2 .....GRIS.....  
 NP\_042783.1 AFSV\* .....IDEAKSLMAGESELV.....SPTANNLVEGV.....VHN  
 YP\_195168.1 phage\_SPM2 .....SPTANNLVEGV.....SPTANNLVEGV.....VHN  
 YP\_214414.1 phage\_P-5M2 .....SPTANNLVEGV.....SPTANNLVEGV.....VHN  
 YP\_214707.1 phage\_P-5M4\* .....SPTANNLVEGV.....SPTANNLVEGV.....VHN  
 YP\_717843.1 phage\_syn9 .....SPTANNLVEGV.....SPTANNLVEGV.....VHN  
 NP\_943895.1 phage\_Aeh1 .....SPTANNLVEGV.....SPTANNLVEGV.....VHN  
 NP\_049662.1 T4\* .....SPTANNLVEGV.....SPTANNLVEGV.....VHN  
 NP\_899330.1 phage\_KVP40 .....SPTANNLVEGV.....SPTANNLVEGV.....VHN  
 NP\_064832.1 AnEPV .....SPTANNLVEGV.....SPTANNLVEGV.....VHN  
 NP\_048107.1 MeEPV\* .....SPTANNLVEGV.....SPTANNLVEGV.....VHN  
 NP\_955144.1 Canarypox\* .....SPTANNLVEGV.....SPTANNLVEGV.....VHN  
 NP\_043990.1 MCV .....SPTANNLVEGV.....SPTANNLVEGV.....VHN  
 NP\_042094.1 Variola .....SPTANNLVEGV.....SPTANNLVEGV.....VHN  
 NP\_073424.1 Yaba .....SPTANNLVEGV.....SPTANNLVEGV.....VHN  
 NP\_951748.1 H.marismortui .....SPTANNLVEGV.....SPTANNLVEGV.....VHN  
 NP\_570196.1 Swinepox .....SPTANNLVEGV.....SPTANNLVEGV.....VHN  
 XP\_001347646.1 P.falci-parumZ .....SPTANNLVEGV.....SPTANNLVEGV.....VHN  
 YP\_803224.1 TnAscov\* .....SPTANNLVEGV.....SPTANNLVEGV.....VHN  
 YP\_762356.1 SFAscov .....SPTANNLVEGV.....SPTANNLVEGV.....VHN  
 CA54471.1 H.vascov\* .....SPTANNLVEGV.....SPTANNLVEGV.....VHN  
 NP\_542554.1 Halovirus\* .....SPTANNLVEGV.....SPTANNLVEGV.....VHN  
 YP\_751308.1 s.frigidimarina\* .....SPTANNLVEGV.....SPTANNLVEGV.....VHN  
 YP\_856637.1 A.hydrophila .....SPTANNLVEGV.....SPTANNLVEGV.....VHN  
 ZP\_00923866.1 E.coli\* .....SPTANNLVEGV.....SPTANNLVEGV.....VHN  
 YP\_502623.1 M.hungatei .....SPTANNLVEGV.....SPTANNLVEGV.....VHN  
 YP\_136425.1 H.marismortui .....SPTANNLVEGV.....SPTANNLVEGV.....VHN  
 NP\_279569.1 Halobact\* .....SPTANNLVEGV.....SPTANNLVEGV.....VHN  
 YP\_684489.1 UnArch1\* .....SPTANNLVEGV.....SPTANNLVEGV.....VHN  
 NP\_394366.1 T.acidophilum\* .....SPTANNLVEGV.....SPTANNLVEGV.....VHN  
 AAZ32459.1 AlivP051 .....SPTANNLVEGV.....SPTANNLVEGV.....VHN  
 XP\_001306813.1 T.vagina1s2\* .....SPTANNLVEGV.....SPTANNLVEGV.....VHN  
 NP\_597442.1 E.cunicul1A .....SPTANNLVEGV.....SPTANNLVEGV.....VHN  
 XP\_657373.1 E.histolyticaA .....SPTANNLVEGV.....SPTANNLVEGV.....VHN  
 CM1176C C.merolaeA .....SPTANNLVEGV.....SPTANNLVEGV.....VHN  
 XP\_001013747.2 T.thermophilaA .....SPTANNLVEGV.....SPTANNLVEGV.....VHN  
 AAK14825.1 P.falci-parumA .....SPTANNLVEGV.....SPTANNLVEGV.....VHN  
 XP\_847318.1 T.brucella .....SPTANNLVEGV.....SPTANNLVEGV.....VHN  
 XP\_640277.1 D.dicoideuma .....SPTANNLVEGV.....SPTANNLVEGV.....VHN  
 NP\_058633.2 H.sapiensA\* .....SPTANNLVEGV.....SPTANNLVEGV.....VHN  
 XP\_763220.1 T.parvaA .....SPTANNLVEGV.....SPTANNLVEGV.....VHN  
 XP\_626972.1 C.parvumA .....SPTANNLVEGV.....SPTANNLVEGV.....VHN  
 XP\_00130643.1 T.vagina1s2 .....SPTANNLVEGV.....SPTANNLVEGV.....VHN  
 XP\_656768.1 E.histolyticaZ .....SPTANNLVEGV.....SPTANNLVEGV.....VHN  
 XP\_001683479.1 L.major2\* .....SPTANNLVEGV.....SPTANNLVEGV.....VHN  
 XP\_847160.1 T.bruceiZ .....SPTANNLVEGV.....SPTANNLVEGV.....VHN  
 CMR103C C.merolaeZ .....SPTANNLVEGV.....SPTANNLVEGV.....VHN  
 XP\_645553.1 D.discoideusz .....SPTANNLVEGV.....SPTANNLVEGV.....VHN  
 AMG0402.1 H.sapiensA\* .....SPTANNLVEGV.....SPTANNLVEGV.....VHN  
 XP\_001011832.1 T.thermophilaZ1 .....SPTANNLVEGV.....SPTANNLVEGV.....VHN  
 XP\_001017761.1 T.thermophilaZ2 .....SPTANNLVEGV.....SPTANNLVEGV.....VHN  
 NP\_149500.1 IiV\* .....SPTANNLVEGV.....SPTANNLVEGV.....VHN  
 NP\_612241.1 IiKv .....SPTANNLVEGV.....SPTANNLVEGV.....VHN  
 YP\_003317.1 F1V .....SPTANNLVEGV.....SPTANNLVEGV.....VHN  
 YP\_073706.1 IdV\* .....SPTANNLVEGV.....SPTANNLVEGV.....VHN  
 YP\_687101.1 UnArch2\* .....SPTANNLVEGV.....SPTANNLVEGV.....VHN  
 AAC62689.1 C.cenarchaeum\* .....SPTANNLVEGV.....SPTANNLVEGV.....VHN  
 NP\_559825.1 P.aerophilum\* .....SPTANNLVEGV.....SPTANNLVEGV.....VHN  
 NP\_146563.1 A.pernix1 .....SPTANNLVEGV.....SPTANNLVEGV.....VHN  
 NP\_342079.1 S.solfataricus1 .....SPTANNLVEGV.....SPTANNLVEGV.....VHN  
 YP\_142676.1 Mimivirus\* .....SPTANNLVEGV.....SPTANNLVEGV.....VHN  
 ABU2317.1 PoV1 .....SPTANNLVEGV.....SPTANNLVEGV.....VHN  
 ABU2318.1 PpV1 .....SPTANNLVEGV.....SPTANNLVEGV.....VHN  
 ABU23716.1 CeV1\* .....SPTANNLVEGV.....SPTANNLVEGV.....VHN  
 NP\_039988.1 Hherpes5 .....SPTANNLVEGV.....SPTANNLVEGV.....VHN  
 BAE19749.1 Hherpes1\* .....SPTANNLVEGV.....SPTANNLVEGV.....VHN  
 YP\_401712.1 Hherpes4 .....SPTANNLVEGV.....SPTANNLVEGV.....VHN  
 NP\_069333.1 A.fulgidus\* .....SPTANNLVEGV.....SPTANNLVEGV.....VHN  
 NP\_378066.1 s.tokaodai11\* .....SPTANNLVEGV.....SPTANNLVEGV.....VHN  
 NP\_148383.2 A.pernix2 .....SPTANNLVEGV.....SPTANNLVEGV.....VHN  
 NP\_559770.1 P.aerophilum2\* .....SPTANNLVEGV.....SPTANNLVEGV.....VHN  
 NP\_614322.1 M.kandleri\* .....SPTANNLVEGV.....SPTANNLVEGV.....VHN  
 YP\_001097770.1 M.maripaludis\* .....SPTANNLVEGV.....SPTANNLVEGV.....VHN  
 NP\_577941.1 P.furiosus .....SPTANNLVEGV.....SPTANNLVEGV.....VHN  
 P56689 T.gorgonarius .....SPTANNLVEGV.....SPTANNLVEGV.....VHN  
 AAR26842.1 F1V1 .....SPTANNLVEGV.....SPTANNLVEGV.....VHN  
 NP\_077578.1 EsV93\* .....SPTANNLVEGV.....SPTANNLVEGV.....VHN  
 YP\_293784.1 EhV86\* .....SPTANNLVEGV.....SPTANNLVEGV.....VHN  
 P30320 CVNY2A\* .....SPTANNLVEGV.....SPTANNLVEGV.....VHN  
 BAA35142.1 CVK2 .....SPTANNLVEGV.....SPTANNLVEGV.....VHN  
 NP\_048532.1 PBCV1\* .....SPTANNLVEGV.....SPTANNLVEGV.....VHN  
 NP\_615844.1 M.acetivorans\* .....SPTANNLVEGV.....SPTANNLVEGV.....VHN  
 YP\_843812.1 M.thermophila\* .....SPTANNLVEGV.....SPTANNLVEGV.....VHN  
 BAE06251.1 HaV1 .....SPTANNLVEGV.....SPTANNLVEGV.....VHN  
 XP\_001707891.1 G.lambiad .....SPTANNLVEGV.....SPTANNLVEGV.....VHN  
 XP\_955596.1 E.cuniculid .....SPTANNLVEGV.....SPTANNLVEGV.....VHN  
 XP\_001326973.1 T.vagina1s1\* .....SPTANNLVEGV.....SPTANNLVEGV.....VHN  
 XP\_001032353.1 T.thermophilaD .....SPTANNLVEGV.....SPTANNLVEGV.....VHN  
 XP\_654477.1 E.histolyticad .....SPTANNLVEGV.....SPTANNLVEGV.....VHN  
 XP\_638283.1 D.discoideumd .....SPTANNLVEGV.....SPTANNLVEGV.....VHN  
 AAA58439.1 H.sapiensD .....SPTANNLVEGV.....SPTANNLVEGV.....VHN  
 XP\_001685930.1 L.ma1s1D .....SPTANNLVEGV.....SPTANNLVEGV.....VHN  
 XP\_951513.1 T.bruceid .....SPTANNLVEGV.....SPTANNLVEGV.....VHN  
 ruler .....210.....220.....230.....240.....250.....260.....270.....280.....290.....300.....310.....320.....330.....340.....350.....360.....370.....380.....390.....400

YP\_001055588.1 P\_caldifontis\*  
 NP\_559083.1 P\_aerophilum3\*  
 NP\_203396.1 CnNPV\*  
 YP\_025135.1 NsnNPV\*  
 NP\_148895.1 CpGranulo\*  
 NP\_835679.1 phase\_RSM2\*  
 NP\_148473.2 A\_pernici\*  
 NP\_342896.1 S\_solfataricus2\*  
 NP\_393928.1 T\_acidophilum2\*  
 NP\_042783.1 AFSV\*  
 YP\_195168.1 phase\_SPM2\*  
 YP\_214414.1 phase\_P-SM2\*  
 YP\_214707.1 phase\_P-SM4\*  
 YP\_717843.1 phase\_Syn1\*  
 NP\_943895.1 phase\_Aeh9\*  
 NP\_049662.1 T4\*  
 NP\_899330.1 phase\_KVP40\*  
 NP\_064832.1 AnEPV\*  
 NP\_048107.1 MeEPV\*  
 NP\_955144.1 Canarypox\*  
 NP\_043990.1 MCV\*  
 NP\_042094.1 Variola\*  
 NP\_073424.1 Yaba\*  
 NP\_136425.1 H\_mariemortu\*  
 NP\_570196.1 Swinepox\*  
 XP\_001347646.1 P\_falciaparumZ\*  
 YP\_803224.1 TnAscov\*  
 YP\_762356.1 SAscov\*  
 NP\_542554.1 Halovirus\*  
 YP\_751308.1 S\_frigidimarina\*  
 YP\_856637.1 A\_hydrophila\*  
 ZP\_00923866.1 E.coli\*  
 YP\_502623.1 M\_hungatei\*  
 YP\_136425.1 H\_mariemortu\*  
 NP\_279569.1 Halobact\*  
 YP\_684489.1 UnArch1\*  
 NP\_394366.1 T\_acidophilum1\*  
 AAC32459.1 AlivP0S1\*  
 XP\_001306652.1 T\_vaginilis2\*  
 NP\_597442.1 E\_cuniculicia\*  
 XP\_657373.1 E\_histolyticaA\*  
 CM1176C C\_merolaeA\*  
 XP\_001013747.2 T\_thermophilaA\*  
 AAK14825.1 P\_faciaparumA\*  
 XP\_847318.1 T\_bruceia\*  
 XP\_640277.1 D\_dicoideuma\*  
 NP\_058633.2 H\_sapiensA\*  
 XP\_763220.1 T\_parvaa\*  
 XP\_626972.1 C\_parvumA\*  
 XP\_00130643.1 T\_vaginilis2\*  
 XP\_656768.1 E\_histolyticaZ\*  
 XP\_001683479.1 L\_major2\*  
 XP\_847160.1 T\_bruceiz\*  
 CMR103C C\_merolaeZ\*  
 XP\_64553.1 D\_discoideumZ\*  
 AAC90922.1 H\_sapiensZ\*  
 XP\_00101832.1 T\_thermophilaZ1\*  
 XP\_001017761.1 T\_thermophilaZ2\*  
 NP\_149500.1 Iiiv\*  
 NP\_612241.1 Iisknv\*  
 YP\_003031.1 FiAvi\*  
 YP\_073706.1 Idv\*  
 YP\_687101.1 UnArch2\*  
 AAC62689.1 C\_cenarchaeum\*  
 NP\_559825.1 P\_aerophilum1\*  
 NP\_148383.2 A\_pernici\*  
 NP\_559770.1 P\_aerophilum2\*  
 NP\_614322.1 M\_kandleri\*  
 YP\_001097770.1 M\_maripaludis\*  
 P56689 T\_gorgonarius\*  
 NP\_048941.1 FiAvi\*  
 NP\_077578.1 EsV93\*  
 YP\_293784.1 Ehv86\*  
 P30320 CVN2A\*  
 BAA35142.1 CVK2\*  
 NP\_048532.1 PBCV1\*  
 NP\_615844.1 M\_acetivorans\*  
 YP\_843812.1 M\_thermophila\*  
 BAR06251.1 Hav1\*  
 XP\_001707891.1 G\_lambiad\*  
 XP\_955596.1 E\_cuniculid\*  
 XP\_001325973.1 T\_vaginilis4\*  
 XP\_001032353.1 T\_thermophilad\*  
 XP\_654477.1 E\_histolyticad\*  
 XP\_638283.1 D\_dicoideumd\*  
 AA554839.1 H\_sapiensD\*  
 XP\_001683479.1 L\_majorD\*  
 XP\_951513.1 T\_bruceid\*  
 ruler .....410.....420.....430.....440.....450.....460.....470.....480.....490.....500.....510.....520.....530.....540.....550.....560.....570.....580.....590.....600

162  
 158  
 230  
 218  
 225  
 206  
 135  
 129  
 117  
 183  
 173  
 171  
 171  
 175  
 251  
 243  
 191  
 175  
 179  
 176  
 176  
 176  
 176  
 375  
 303  
 312  
 316  
 148  
 140  
 135  
 137  
 173  
 148  
 178  
 181  
 144  
 142  
 203  
 183  
 170  
 229  
 252  
 250  
 203  
 192  
 154  
 209  
 209  
 208  
 208  
 208  
 224  
 225  
 209  
 211  
 211  
 220  
 227  
 149  
 146  
 152  
 349  
 230  
 231  
 277  
 238  
 192  
 145  
 145  
 151  
 146  
 160  
 150  
 146  
 146  
 160  
 156  
 164  
 164  
 164  
 186  
 154  
 185  
 154  
 156  
 155  
 155

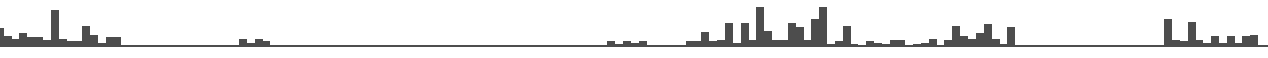



YP\_001055588.1\_P\_caldiffontis\*  
 NP\_559083.1\_P\_aerophilum3\*  
 NP\_203396.1\_CnNPV\*  
 YP\_025135.1\_MnNPV\*  
 NP\_148895.1\_CpGranulov\*  
 NP\_835679.1\_phase\_RM378\*  
 NP\_148473.2\_A\_perisul\*  
 NP\_342896.1\_S\_solfataricus2\*  
 NP\_393928.1\_T\_acidophilum2  
 NP\_042783.1\_AFSV\*  
 YP\_195168.1\_phase\_SFM2  
 YP\_214414.1\_phase\_P-SM2  
 YP\_214707.1\_phase\_P-SM4\*  
 YP\_717843.1\_phase\_syn9  
 NP\_943895.1\_phase\_Aehl  
 NP\_049662.1\_T4\*  
 NP\_899330.1\_phase\_KVP40  
 NP\_064832.1\_AneEPV  
 NP\_048107.1\_MeEPV\*  
 NP\_955144.1\_Canarypox\*  
 NP\_043990.1\_MCV  
 NP\_042094.1\_Variola  
 NP\_073424.1\_Yaba  
 NP\_951748.1\_H\_marismortui  
 NP\_570196.1\_Swinepox  
 XP\_001347646.1\_P\_falciparumZ  
 YP\_803224.1\_TnAscov\*  
 YP\_762356.1\_SAscov  
 CAG54471.1\_RvAscov\*  
 NP\_542554.1\_E\_halyovirus\*  
 YP\_751308.1\_S\_frigidimarina\*  
 YP\_856637.1\_A\_hydrophila  
 ZP\_00923866.1\_E\_coli\*  
 YP\_502623.1\_M\_hungatei  
 YP\_136425.1\_H\_marismortui  
 NP\_279569.1\_Halobact\*  
 YP\_684489.1\_UnArch1\*  
 NP\_394366.1\_T\_acidophilum1\*  
 AAZ32459.1\_AlvP0S1  
 XP\_001306852.1\_C\_merolaeZ  
 NP\_597442.1\_E\_cuniculicia  
 XP\_657373.1\_E\_histolyticAA  
 CM1176C\_C\_merolaeA  
 XP\_001013747.2\_T\_thermophilaA  
 AAK14825.1\_P\_faciparumA  
 XP\_947318.1\_T\_brucella  
 XP\_640277.1\_D\_dicoideuma  
 NP\_058633.2\_H\_sapiensA  
 XP\_763220.1\_T\_parvaa  
 XP\_626972.1\_C\_paryvumA  
 XP\_00130643.1\_T\_vaginilisZ  
 XP\_656768.1\_E\_histolyticAZ  
 XP\_001683479.1\_L\_majorZ\*  
 XP\_847160.1\_T\_brucellZ  
 CMR103C\_C\_merolaeZ  
 XP\_64553.1\_D\_discoideumZ  
 AM90402.1\_S\_aerophilumZ\*  
 XP\_00101832.1\_T\_thermophilaZ1  
 XP\_001017761.1\_T\_thermophilaZ2  
 NP\_149500.1\_Iivv\*  
 NP\_612241.1\_Iiknv  
 YP\_00381.1\_FiV\*  
 YP\_073706.1\_ldv\*  
 YP\_687101.1\_UnArch2\*  
 AAC62689.1\_C\_cenarchaeum\*  
 NP\_559825.1\_P\_aerophilum1\*  
 NP\_146963.1\_A\_pernix1  
 NP\_342079.1\_S\_solfataricus1  
 YP\_142676.1\_Minivirus\*  
 ABU2317.1\_Pov1\*  
 ABU2318.1\_Ppv1  
 NP\_039988.1\_Hherpes1\*  
 BAEP19749.1\_Hherpes1\*  
 YP\_401712.1\_Hherpes4  
 NP\_069333.1\_A\_fulgidus\*  
 NP\_378066.1\_S\_tokoadaii1\*  
 NP\_148383.2\_D\_perisul\*  
 NP\_559770.1\_P\_aerophilum2\*  
 NP\_614322.1\_M\_kandleri\*  
 YP\_001097770.1\_M\_maripaludis\*  
 NP\_577941.1\_P\_furiosus  
 P56689\_T\_gorgonarius\*  
 NP\_842684.1\_H1N1v\*  
 NP\_075578.1\_Esv93\*  
 YP\_293784.1\_Ehv86\*  
 P30320\_CVNY2A\*  
 BAA35142.1\_CVK2  
 NP\_048532.1\_PBCV1\*  
 NP\_615844.1\_A\_moraxellorans\*  
 YP\_843812.1\_M\_thermophila\*  
 BAR06251.1\_Hav1\*  
 XP\_001707891.1\_G\_lambdiad  
 XP\_955596.1\_E\_cuniculid  
 XP\_001326973.1\_T\_vaginilisZ  
 XP\_001032353.1\_T\_thermophilid  
 XP\_654477.1\_E\_histolyticAD  
 XP\_638283.1\_D\_discoideumD  
 AA558439.1\_H\_sapiensSD  
 XP\_001685930.1\_H\_sapiensD  
 XP\_951533.1\_T\_brucellD  
 ruler

260  
 266  
 372  
 336  
 371  
 355  
 267  
 234  
 242  
 344  
 338  
 336  
 336  
 337  
 427  
 413  
 350  
 358  
 351  
 358  
 354  
 354  
 355  
 519  
 441  
 455  
 453  
 352  
 284  
 281  
 279  
 315  
 318  
 321  
 304  
 271  
 269  
 341  
 329  
 301  
 387  
 389  
 396  
 342  
 392  
 337  
 369  
 353  
 379  
 413  
 344  
 356  
 357  
 448  
 337  
 332  
 351  
 358  
 270  
 266  
 269  
 276  
 491  
 390  
 279  
 387  
 472  
 360  
 263  
 260  
 267  
 270  
 283  
 277  
 271  
 271  
 313  
 301  
 298  
 297  
 297  
 289  
 312  
 296  
 323  
 292  
 295  
 292  
 293

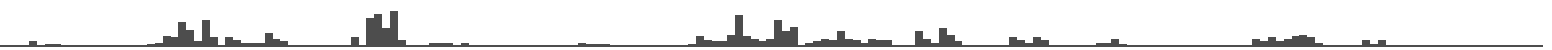

YP\_001055588.1\_P.calidfontinis\* --- ELPED --- LTRASATL --- EYVTF --- EGGPPRALDAROF --- LLLAAHHA --- IANRNSG --- VETSPDEEDDA --- EN 350  
 NP\_559083.1\_P.aerophilum3\* --- FEQFI --- LTRASATL --- EYVTF --- EGGPPRALDAROF --- LLLAAHHA --- IANRNSG --- VETSPDEEDDA --- EN 315  
 NP\_203396.1\_CnNPV\* --- SVDSS --- LSRTLSL --- EYVTF --- EGGPPRALDAROF --- LLLAAHHA --- IANRNSG --- VETSPDEEDDA --- EN 413  
 YP\_025135.1\_NsnPV\* --- LITE --- VLDVLTLS --- SVCSK --- EGGPPRALDAROF --- LLLAAHHA --- IANRNSG --- VETSPDEEDDA --- EN 382  
 NP\_148895.1\_CpGranulo\* --- WANCEE --- VNSQTLNE --- NNGGG --- EGGPPRALDAROF --- LLLAAHHA --- IANRNSG --- VETSPDEEDDA --- EN 422  
 NP\_835679.1\_phase\_P-SSM2 --- VVSVVEE --- VMSKRENY --- EYVTF --- EGGPPRALDAROF --- LLLAAHHA --- IANRNSG --- VETSPDEEDDA --- EN 409  
 NP\_148473.2\_A.pernix1\* --- VEE --- LVEKSDPE --- EYVTF --- EGGPPRALDAROF --- LLLAAHHA --- IANRNSG --- VETSPDEEDDA --- EN 301  
 NP\_342896.1\_S.solfataricus2\* --- EYVTF --- EGGPPRALDAROF --- LLLAAHHA --- IANRNSG --- VETSPDEEDDA --- EN 251  
 NP\_393928.1\_T.acidophilum2 --- EYVTF --- EGGPPRALDAROF --- LLLAAHHA --- IANRNSG --- VETSPDEEDDA --- EN 286  
 NP\_042783.1\_AFSV\* --- VNMKQ --- VNSRKLIT --- EYVTF --- EGGPPRALDAROF --- LLLAAHHA --- IANRNSG --- VETSPDEEDDA --- EN 403  
 YP\_195168.1\_phase\_SPM2 --- VED --- LAFPRGNG --- EYVTF --- EGGPPRALDAROF --- LLLAAHHA --- IANRNSG --- VETSPDEEDDA --- EN 396  
 YP\_214414.1\_phase\_P-SSM2 --- VED --- LAFPRGNG --- EYVTF --- EGGPPRALDAROF --- LLLAAHHA --- IANRNSG --- VETSPDEEDDA --- EN 394  
 YP\_214707.1\_phase\_P-SSM2 --- VED --- LAFPRGNG --- EYVTF --- EGGPPRALDAROF --- LLLAAHHA --- IANRNSG --- VETSPDEEDDA --- EN 394  
 YP\_717843.1\_phase\_syn9 --- SLDPE --- LSPRGNCK --- EYVTF --- EGGPPRALDAROF --- LLLAAHHA --- IANRNSG --- VETSPDEEDDA --- EN 398  
 NP\_943895.1\_phase\_Aeh1 --- KDLAS --- VSSANNEX --- EYVTF --- EGGPPRALDAROF --- LLLAAHHA --- IANRNSG --- VETSPDEEDDA --- EN 480  
 NP\_049662.1\_T4\* --- QDD --- KVLAETKA --- EYVTF --- EGGPPRALDAROF --- LLLAAHHA --- IANRNSG --- VETSPDEEDDA --- EN 441  
 NP\_899330.1\_phase\_KVP40 --- AAFQOE --- VSVSSANN --- EYVTF --- EGGPPRALDAROF --- LLLAAHHA --- IANRNSG --- VETSPDEEDDA --- EN 407  
 NP\_064832.1\_AneEPV --- QMDDND --- EYVTF --- EGGPPRALDAROF --- LLLAAHHA --- IANRNSG --- VETSPDEEDDA --- EN 404  
 NP\_048107.1\_MsEPV\* --- DNMVD --- LAVTKRSG --- EYVTF --- EGGPPRALDAROF --- LLLAAHHA --- IANRNSG --- VETSPDEEDDA --- EN 396  
 NP\_955144.1\_Canarypox\* --- NNNFE --- LTL --- VLSRKHEN --- EYVTF --- EGGPPRALDAROF --- LLLAAHHA --- IANRNSG --- VETSPDEEDDA --- EN 402  
 NP\_043990.1\_MCV --- ARAQPEH --- VLSRKHEN --- EYVTF --- EGGPPRALDAROF --- LLLAAHHA --- IANRNSG --- VETSPDEEDDA --- EN 400  
 NP\_042094.1\_Variola --- SRSSPEL --- VLSRKHEN --- EYVTF --- EGGPPRALDAROF --- LLLAAHHA --- IANRNSG --- VETSPDEEDDA --- EN 400  
 NP\_073424.1\_Yaba --- SRSSPEL --- VLSRKHEN --- EYVTF --- EGGPPRALDAROF --- LLLAAHHA --- IANRNSG --- VETSPDEEDDA --- EN 401  
 NP\_951748.1\_Myxoma --- SRSSPEL --- VLSRKHEN --- EYVTF --- EGGPPRALDAROF --- LLLAAHHA --- IANRNSG --- VETSPDEEDDA --- EN 588  
 NP\_570196.1\_Swinepox --- KRAPLDL --- VLSRKHEN --- EYVTF --- EGGPPRALDAROF --- LLLAAHHA --- IANRNSG --- VETSPDEEDDA --- EN 517  
 XP\_001347646.1\_P.falciiparumZ --- KRAPLDL --- VLSRKHEN --- EYVTF --- EGGPPRALDAROF --- LLLAAHHA --- IANRNSG --- VETSPDEEDDA --- EN 530  
 YP\_803224.1\_TnAscov\* --- SEVSKSGD --- GVLKPSMKN --- EYVTF --- EGGPPRALDAROF --- LLLAAHHA --- IANRNSG --- VETSPDEEDDA --- EN 528  
 YP\_762356.1\_sAscov --- SEVSKSGD --- GVLKPSMKN --- EYVTF --- EGGPPRALDAROF --- LLLAAHHA --- IANRNSG --- VETSPDEEDDA --- EN 401  
 GAG4471.1\_sAscov\* --- SEVSKSGD --- GVLKPSMKN --- EYVTF --- EGGPPRALDAROF --- LLLAAHHA --- IANRNSG --- VETSPDEEDDA --- EN 331  
 NP\_542554.1\_Halovirus\* --- EYVTF --- EGGPPRALDAROF --- LLLAAHHA --- IANRNSG --- VETSPDEEDDA --- EN 331  
 YP\_751308.1\_s.frigidimarina\* --- SDNE --- LTRKXR --- EYVTF --- EGGPPRALDAROF --- LLLAAHHA --- IANRNSG --- VETSPDEEDDA --- EN 329  
 YP\_856637.1\_A.hydrophila --- HDEE --- LVYRKR --- EYVTF --- EGGPPRALDAROF --- LLLAAHHA --- IANRNSG --- VETSPDEEDDA --- EN 360  
 ZP\_00923866.1\_E.coli\* --- HDEE --- LVYRKR --- EYVTF --- EGGPPRALDAROF --- LLLAAHHA --- IANRNSG --- VETSPDEEDDA --- EN 363  
 YP\_502623.1\_M.hungatei --- HDEE --- LVYRKR --- EYVTF --- EGGPPRALDAROF --- LLLAAHHA --- IANRNSG --- VETSPDEEDDA --- EN 366  
 YP\_136425.1\_H.marismortui --- HDEE --- LVYRKR --- EYVTF --- EGGPPRALDAROF --- LLLAAHHA --- IANRNSG --- VETSPDEEDDA --- EN 349  
 NP\_279569.1\_Halobact\* --- ADDDD --- GLPGGIGK --- EYVTF --- EGGPPRALDAROF --- LLLAAHHA --- IANRNSG --- VETSPDEEDDA --- EN 319  
 YP\_684489.1\_UnArch1\* --- VDLSE --- LTRKXR --- EYVTF --- EGGPPRALDAROF --- LLLAAHHA --- IANRNSG --- VETSPDEEDDA --- EN 314  
 NP\_394366.1\_T.acidophilum1\* --- PSDDDD --- LVISRTVVD --- EYVTF --- EGGPPRALDAROF --- LLLAAHHA --- IANRNSG --- VETSPDEEDDA --- EN 431  
 AAZ32459.1\_AlvP0S1 --- PSDDDD --- LVISRTVVD --- EYVTF --- EGGPPRALDAROF --- LLLAAHHA --- IANRNSG --- VETSPDEEDDA --- EN 383  
 XP\_001306852.1\_T.vaginalis2\* --- PSDDDD --- LVISRTVVD --- EYVTF --- EGGPPRALDAROF --- LLLAAHHA --- IANRNSG --- VETSPDEEDDA --- EN 342  
 NP\_597442.1\_E.cuniculila --- PSDDDD --- LVISRTVVD --- EYVTF --- EGGPPRALDAROF --- LLLAAHHA --- IANRNSG --- VETSPDEEDDA --- EN 440  
 XP\_657373.1\_E.histolyticaA --- VDLSE --- LTRKXR --- EYVTF --- EGGPPRALDAROF --- LLLAAHHA --- IANRNSG --- VETSPDEEDDA --- EN 445  
 CML176C\_C.merolaeA --- VDLSE --- LTRKXR --- EYVTF --- EGGPPRALDAROF --- LLLAAHHA --- IANRNSG --- VETSPDEEDDA --- EN 437  
 XP\_001013747.2\_T.thermophilaA --- QNVKNSN --- VYTKRITL --- EYVTF --- EGGPPRALDAROF --- LLLAAHHA --- IANRNSG --- VETSPDEEDDA --- EN 375  
 AAK14825.1\_P.falciiparumA --- NDEDDLD --- VYTKRITL --- EYVTF --- EGGPPRALDAROF --- LLLAAHHA --- IANRNSG --- VETSPDEEDDA --- EN 336  
 XP\_847318.1\_T.bruceila --- AVEX --- LTRKXR --- EYVTF --- EGGPPRALDAROF --- LLLAAHHA --- IANRNSG --- VETSPDEEDDA --- EN 399  
 XP\_640277.1\_D.dicoideuma --- AVEX --- LTRKXR --- EYVTF --- EGGPPRALDAROF --- LLLAAHHA --- IANRNSG --- VETSPDEEDDA --- EN 395  
 NP\_058633.2\_H.sapiensA\* --- VYSO --- EYVTF --- EGGPPRALDAROF --- LLLAAHHA --- IANRNSG --- VETSPDEEDDA --- EN 425  
 XP\_763220.1\_T.parvaA --- ELSK --- LTRKXR --- EYVTF --- EGGPPRALDAROF --- LLLAAHHA --- IANRNSG --- VETSPDEEDDA --- EN 469  
 XP\_626972.1\_C.parvumA --- SNSEPEL --- VYTKRITL --- EYVTF --- EGGPPRALDAROF --- LLLAAHHA --- IANRNSG --- VETSPDEEDDA --- EN 391  
 XP\_00130643.1\_T.vaginalis2\* --- GDD --- VYTKRITL --- EYVTF --- EGGPPRALDAROF --- LLLAAHHA --- IANRNSG --- VETSPDEEDDA --- EN 400  
 XP\_656768.1\_E.histolyticaZ --- GDD --- VYTKRITL --- EYVTF --- EGGPPRALDAROF --- LLLAAHHA --- IANRNSG --- VETSPDEEDDA --- EN 403  
 XP\_001683479.1\_L.major2\* --- ANFQ --- CTRFAVKL --- EYVTF --- EGGPPRALDAROF --- LLLAAHHA --- IANRNSG --- VETSPDEEDDA --- EN 545  
 XP\_847160.1\_T.bruceilaZ --- CSFVD --- CTRFAVKL --- EYVTF --- EGGPPRALDAROF --- LLLAAHHA --- IANRNSG --- VETSPDEEDDA --- EN 424  
 CML103C\_C.merolaeZ --- DPERD --- ALPPEEVL --- EYVTF --- EGGPPRALDAROF --- LLLAAHHA --- IANRNSG --- VETSPDEEDDA --- EN 402  
 XP\_645553.1\_D.discoideumZ --- DPERD --- ALPPEEVL --- EYVTF --- EGGPPRALDAROF --- LLLAAHHA --- IANRNSG --- VETSPDEEDDA --- EN 317  
 AAG09402.1\_H.sapiensZ\* --- DPERD --- ALPPEEVL --- EYVTF --- EGGPPRALDAROF --- LLLAAHHA --- IANRNSG --- VETSPDEEDDA --- EN 317  
 XP\_001011832.1\_T.thermophilaZ1 --- SDND --- LTRKXR --- EYVTF --- EGGPPRALDAROF --- LLLAAHHA --- IANRNSG --- VETSPDEEDDA --- EN 424  
 XP\_0010117761.1\_T.thermophilaZ2 --- VNSK --- CLAKEVKG --- EYVTF --- EGGPPRALDAROF --- LLLAAHHA --- IANRNSG --- VETSPDEEDDA --- EN 402  
 NP\_149500.1\_Iivk\* --- EN --- LTRKXR --- EYVTF --- EGGPPRALDAROF --- LLLAAHHA --- IANRNSG --- VETSPDEEDDA --- EN 317  
 NP\_612241.1\_Iivk --- EN --- LTRKXR --- EYVTF --- EGGPPRALDAROF --- LLLAAHHA --- IANRNSG --- VETSPDEEDDA --- EN 317  
 YP\_003031.1\_FiAt\* --- FEED --- VYTKRITL --- EYVTF --- EGGPPRALDAROF --- LLLAAHHA --- IANRNSG --- VETSPDEEDDA --- EN 424  
 YP\_073706.1\_ldv\* --- FEED --- VYTKRITL --- EYVTF --- EGGPPRALDAROF --- LLLAAHHA --- IANRNSG --- VETSPDEEDDA --- EN 402  
 YP\_687101.1\_UnArch2\* --- VPEPE --- LAVRKLSE --- EYVTF --- EGGPPRALDAROF --- LLLAAHHA --- IANRNSG --- VETSPDEEDDA --- EN 317  
 AAC62689.1\_C.cenarchaeum\* --- ERGVPLAD --- LAVRKLSE --- EYVTF --- EGGPPRALDAROF --- LLLAAHHA --- IANRNSG --- VETSPDEEDDA --- EN 313  
 NP\_559825.1\_P.aerophilum1\* --- EKKITLDD --- GYKLVNLS --- EYVTF --- EGGPPRALDAROF --- LLLAAHHA --- IANRNSG --- VETSPDEEDDA --- EN 317  
 NP\_146963.1\_A.pernix1 --- EKKITLDD --- GYKLVNLS --- EYVTF --- EGGPPRALDAROF --- LLLAAHHA --- IANRNSG --- VETSPDEEDDA --- EN 317  
 NP\_342079.1\_S.solfataricus1 --- EKKITLDD --- GYKLVNLS --- EYVTF --- EGGPPRALDAROF --- LLLAAHHA --- IANRNSG --- VETSPDEEDDA --- EN 536  
 YP\_142676.1\_Mimivirus\* --- EYVTF --- EGGPPRALDAROF --- LLLAAHHA --- IANRNSG --- VETSPDEEDDA --- EN 435  
 ABU2317.1\_PoV1\* --- EYVTF --- EGGPPRALDAROF --- LLLAAHHA --- IANRNSG --- VETSPDEEDDA --- EN 292  
 ABU2318.1\_PpV1 --- EYVTF --- EGGPPRALDAROF --- LLLAAHHA --- IANRNSG --- VETSPDEEDDA --- EN 432  
 ABU23716.1\_CeV1\* --- EYVTF --- EGGPPRALDAROF --- LLLAAHHA --- IANRNSG --- VETSPDEEDDA --- EN 520  
 NP\_039988.1\_Hherpes1\* --- EYVTF --- EGGPPRALDAROF --- LLLAAHHA --- IANRNSG --- VETSPDEEDDA --- EN 456  
 BAE19749.1\_Hherpes1\* --- EYVTF --- EGGPPRALDAROF --- LLLAAHHA --- IANRNSG --- VETSPDEEDDA --- EN 409  
 YP\_401712.1\_Hherpes4 --- EYVTF --- EGGPPRALDAROF --- LLLAAHHA --- IANRNSG --- VETSPDEEDDA --- EN 307  
 NP\_069333.1\_A.fulgidus\* --- VSEEE --- VYTKRITL --- EYVTF --- EGGPPRALDAROF --- LLLAAHHA --- IANRNSG --- VETSPDEEDDA --- EN 304  
 NP\_378066.1\_s.tokoadaii1\* --- EYVTF --- EGGPPRALDAROF --- LLLAAHHA --- IANRNSG --- VETSPDEEDDA --- EN 314  
 NP\_148383.2\_A.pernix2\* --- EYVTF --- EGGPPRALDAROF --- LLLAAHHA --- IANRNSG --- VETSPDEEDDA --- EN 328  
 NP\_559770.1\_P.aerophilum2\* --- EYVTF --- EGGPPRALDAROF --- LLLAAHHA --- IANRNSG --- VETSPDEEDDA --- EN 321  
 NP\_614322.1\_M.kandleri\* --- VDEED --- LAVTSQTL --- EYVTF --- EGGPPRALDAROF --- LLLAAHHA --- IANRNSG --- VETSPDEEDDA --- EN 315  
 YP\_001097770.1\_M.maripaludis\* --- VDEED --- LAVTSQTL --- EYVTF --- EGGPPRALDAROF --- LLLAAHHA --- IANRNSG --- VETSPDEEDDA --- EN 315  
 NP\_577941.1\_P.furiosus --- VDEED --- LAVTSQTL --- EYVTF --- EGGPPRALDAROF --- LLLAAHHA --- IANRNSG --- VETSPDEEDDA --- EN 315  
 P56689\_T.gorgonarius --- VDEED --- LAVTSQTL --- EYVTF --- EGGPPRALDAROF --- LLLAAHHA --- IANRNSG --- VETSPDEEDDA --- EN 454  
 NP\_248264.1\_FiV1\* --- EYVTF --- EGGPPRALDAROF --- LLLAAHHA --- IANRNSG --- VETSPDEEDDA --- EN 465  
 NP\_077578.1\_EhV93\* --- EYVTF --- EGGPPRALDAROF --- LLLAAHHA --- IANRNSG --- VETSPDEEDDA --- EN 345  
 YP\_293784.1\_EhV86\* --- EYVTF --- EGGPPRALDAROF --- LLLAAHHA --- IANRNSG --- VETSPDEEDDA --- EN 343  
 P30320\_CVNY2A\* --- DNEP --- VYTKRITL --- EYVTF --- EGGPPRALDAROF --- LLLAAHHA --- IANRNSG --- VETSPDEEDDA --- EN 343  
 BAA35142.1\_CVK2 --- DNEP --- VYTKRITL --- EYVTF --- EGGPPRALDAROF --- LLLAAHHA --- IANRNSG --- VETSPDEEDDA --- EN 360  
 NP\_048532.1\_PBCV1\* --- DNEP --- VYTKRITL --- EYVTF --- EGGPPRALDAROF --- LLLAAHHA --- IANRNSG --- VETSPDEEDDA --- EN 428  
 NP\_615844.1\_M.acetivorans\* --- EYVTF --- EGGPPRALDAROF --- LLLAAHHA --- IANRNSG --- VETSPDEEDDA --- EN 331  
 YP\_843812.1\_M.thermophila\* --- EYVTF --- EGGPPRALDAROF --- LLLAAHHA --- IANRNSG --- VETSPDEEDDA --- EN 520  
 BAE06251.1\_Hav1\* --- EYVTF --- EGGPPRALDAROF --- LLLAAHHA --- IANRNSG --- VETSPDEEDDA --- EN 335  
 XP\_001707891.1\_G.lambliad --- EYVTF --- EGGPPRALDAROF --- LLLAAHHA --- IANRNSG --- VETSPDEEDDA --- EN 366  
 XP\_955596.1\_E.cuniculid --- EYVTF --- EGGPPRALDAROF --- LLLAAHHA --- IANRNSG --- VETSPDEEDDA --- EN 367  
 XP\_001326973.1\_T.vaginalis1\* --- EYVTF --- EGGPPRALDAROF --- LLLAAHHA --- IANRNSG --- VETSPDEEDDA --- EN 367  
 XP\_001032353.1\_T.thermophilad --- EYVTF --- EGGPPRALDAROF --- LLLAAHHA --- IANRNSG --- VETSPDEEDDA --- EN 366  
 XP\_654477.1\_E.histolyticad --- EYVTF --- EGGPPRALDAROF --- LLLAAHHA --- IANRNSG --- VETSPDEEDDA --- EN 366  
 XP\_638283.1\_D.discoideumD --- EYVTF --- EGGPPRALDAROF --- LLLAAHHA --- IANRNSG --- VETSPDEEDDA --- EN 341  
 AAS58439.1\_H.sapiensD\* --- EYVTF --- EGGPPRALDAROF --- LLLAAHHA --- IANRNSG --- VETSPDEEDDA --- EN 339  
 XP\_001685930.1\_L.mariseid --- EYVTF --- EGGPPRALDAROF --- LLLAAHHA --- IANRNSG --- VETSPDEEDDA --- EN 339  
 XP\_951513.1\_T.bruceid --- EYVTF --- EGGPPRALDAROF --- LLLAAHHA --- IANRNSG --- VETSPDEEDDA --- EN 339  
 ruler .....1010.....1020.....1030.....1040.....1050.....1060.....1070.....1080.....1090.....1100.....1110.....1120.....1130.....1140.....1150.....1160.....1170.....1180.....1190.....1200

YP\_001055588.1\_P.calidfontis\* ... NP\_559083.1\_P.aerophilum3\* ... NP\_203396.1\_CnNPV\* ... NP\_025135.1\_MnNPV\* ... NP\_148895.1\_CpGranulo\* ... NP\_835679.1\_phase\_RM378\* ... NP\_148473.2\_A.pernix1\* ... NP\_342896.1\_S.solfataricus2\* ... NP\_393928.1\_T.acidophilum2 ... NP\_042783.1\_AFSV\* ... YP\_195168.1\_phase\_SFM2 ... YP\_214414.1\_phase\_P-SM2 ... YP\_214707.1\_phase\_P-SM4\* ... YP\_717843.1\_phase\_syn9 ... NP\_943895.1\_phase\_Aeh1 ... NP\_049662.1\_T4\* ... NP\_899330.1\_phase\_KVP40 ... NP\_064832.1\_AnEPV ... NP\_048107.1\_MeFPV\* ... NP\_955144.1\_Canarypox\* ... NP\_043990.1\_MCV ... NP\_042094.1\_Variola ... NP\_073424.1\_Yaba ... NP\_051748.1\_Mycoma ... NP\_570196.1\_Swinepox ... XP\_001347646.1\_P.falciplarumZ ... YP\_803224.1\_TnAscov\* ... YP\_762356.1\_SAscov ... CA64471.1\_RvAscov\* ... NP\_542554.1\_Halovirus\* ... YP\_751308.1\_s.frigidimarina\* ... YP\_856637.1\_A.hydrophila ... ZP\_00923866.1\_E.coli\* ... YP\_502623.1\_M.hungatei ... YP\_136425.1\_H.marismortui ... NP\_279569.1\_Halobact\* ... YP\_684489.1\_UnArch1\* ... NP\_394366.1\_T.acidophilum1 ... AAZ32459.1\_AlvP0S1 ... XP\_001306652.1\_T.vaginalis2 ... NP\_597442.1\_E.cuniculicia ... XP\_657373.1\_E.histolyticaA ... CM1176C\_C.merolaeA ... XP\_001013747.2\_T.thermophilaA ... AAK14825.1\_P.faciplarumA ... XP\_847318.1\_T.bruceiA ... XP\_640277.1\_D.dicoideuma\* ... NP\_058633.2\_H.sapiensa\* ... XP\_763220.1\_T.parvaA ... XP\_626972.1\_C.parvumA ... XP\_00130643.1\_T.vaginalis2 ... YP\_656768.1\_E.histolyticaZ ... XP\_001683479.1\_L.major2\* ... XP\_847160.1\_T.bruceiZ ... CMR103C\_C.merolaeZ ... XP\_64553.1\_D.discoideumZ ... AAG094022.1\_H.sapiensaZ\* ... XP\_00101832.1\_T.thermophilaZ1 ... XP\_001017761.1\_T.thermophilaZ2 ... NP\_149500.1\_IIV6\* ... NP\_612241.1\_Isknv ... YP\_003818.1\_Aiv ... YP\_073706.1\_ldv\* ... YP\_687101.1\_UnArch2\* ... AAC62689.1\_C.cenarchaeum\* ... NP\_559825.1\_P.aerophilum1\* ... NP\_146963.1\_A.pernix1 ... NP\_342079.1\_S.solfataricus1 ... YP\_142676.1\_Minivirus\* ... ABU2317.1\_Pov1\* ... ABU2318.1\_Ppv1 ... NP\_039988.1\_Hherpes1\* ... BAE19749.1\_Hherpes1\* ... YP\_401712.1\_Hherpes4 ... NP\_069333.1\_A.fulgidas\* ... NP\_378066.1\_S.tokoadai11\* ... NP\_148383.2\_A.pernix2 ... NP\_559770.1\_P.aerophilum2\* ... NP\_614322.1\_M.kandleri\* ... YP\_001097770.1\_M.maripaludis\* ... NP\_577941.1\_P.furiosus ... P56689\_T.gorgonarius\* ... NP\_842842.1\_Fiv1\* ... NP\_077578.1\_Esv93\* ... YP\_293784.1\_Ehv86\* ... P30320\_CVNY2A\* ... BAA35142.1\_CVK2 ... NP\_048532.1\_PBCV1\* ... YP\_615844.1\_M.acetivorans\* ... YP\_843812.1\_M.thermophila\* ... BAR06251.1\_Hav1\* ... XP\_001707891.1\_G.lambliad ... XP\_955596.1\_E.cuniculid ... XP\_001326973.1\_T.vaginalis4\* ... XP\_001032353.1\_T.thermophilaD ... XP\_654477.1\_E.histolyticaD ... XP\_638283.1\_D.discoideumD ... AAA58439.1\_H.sapiensD\* ... XP\_001684930.1\_P.terreusD ... XP\_951513.1\_T.bruceiD ruler

410  
358  
509  
455  
492  
520  
346  
303  
342  
487  
464  
463  
462  
466  
555  
499  
477  
485  
469  
464  
470  
468  
468  
468  
469  
672  
591  
599  
599  
474  
387  
387  
385  
432  
453  
456  
413  
382  
581  
447  
413  
522  
528  
526  
474  
448  
408  
496  
476  
454  
449  
472  
502  
496  
537  
479  
467  
476  
616  
502  
372  
452  
498  
374  
369  
372  
376  
612  
510  
321  
496  
648  
580  
482  
385  
368  
374  
377  
393  
380  
380  
380  
554  
547  
419  
418  
418  
414  
496  
402  
589  
419  
455  
453  
454  
421  
429  
425  
426

.....1210.....1220.....1230.....1240.....1250.....1260.....1270.....1280.....1290.....1300.....1310.....1320.....1330.....1340.....1350.....1360.....1370.....1380.....
