# Supplementary material for: Taxonomic distribution of large DNA viruses in the sea
Source: PubMed Central journal article supplement (PMC2530865; doi:10.1186/gb-2008-9-7-r106), 2008-07-03
Supplement: gb-2008-9-7-r106-S3.pdf [file gb-2008-9-7-r106-S3.pdf]

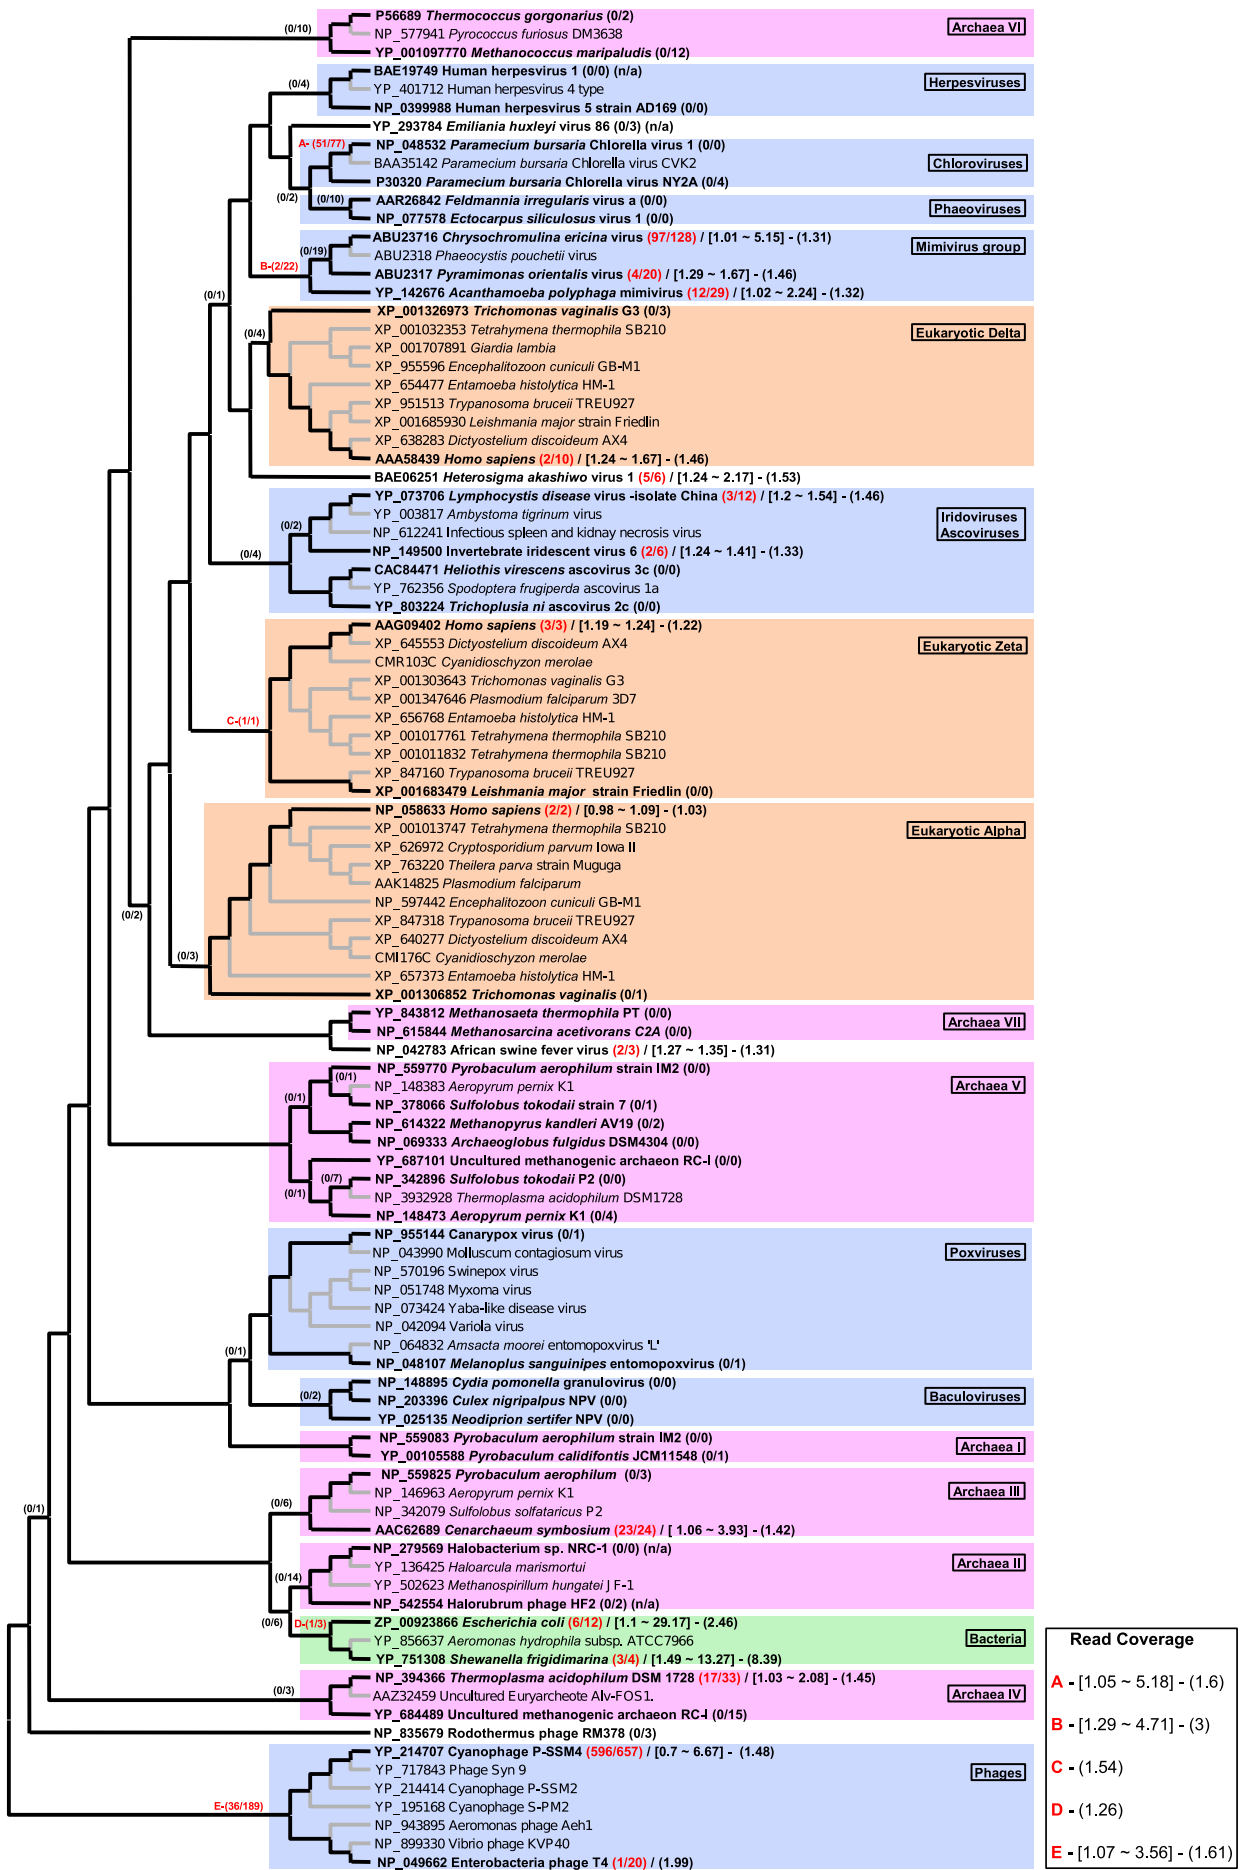

**Read Coverage**

- A - [1.05 ~ 5.18] - (1.6)
- B - [1.29 ~ 4.71] - (3)
- C - (1.54)
- D - (1.26)
- E - [1.07 ~ 3.56] - (1.61)
